# Supplementary material
Source: PubMed Central journal article supplement (PMC2639733)

Figure S1

Average silhouette widths for PAM clustering of RLK expression profiles across different values of  $K$

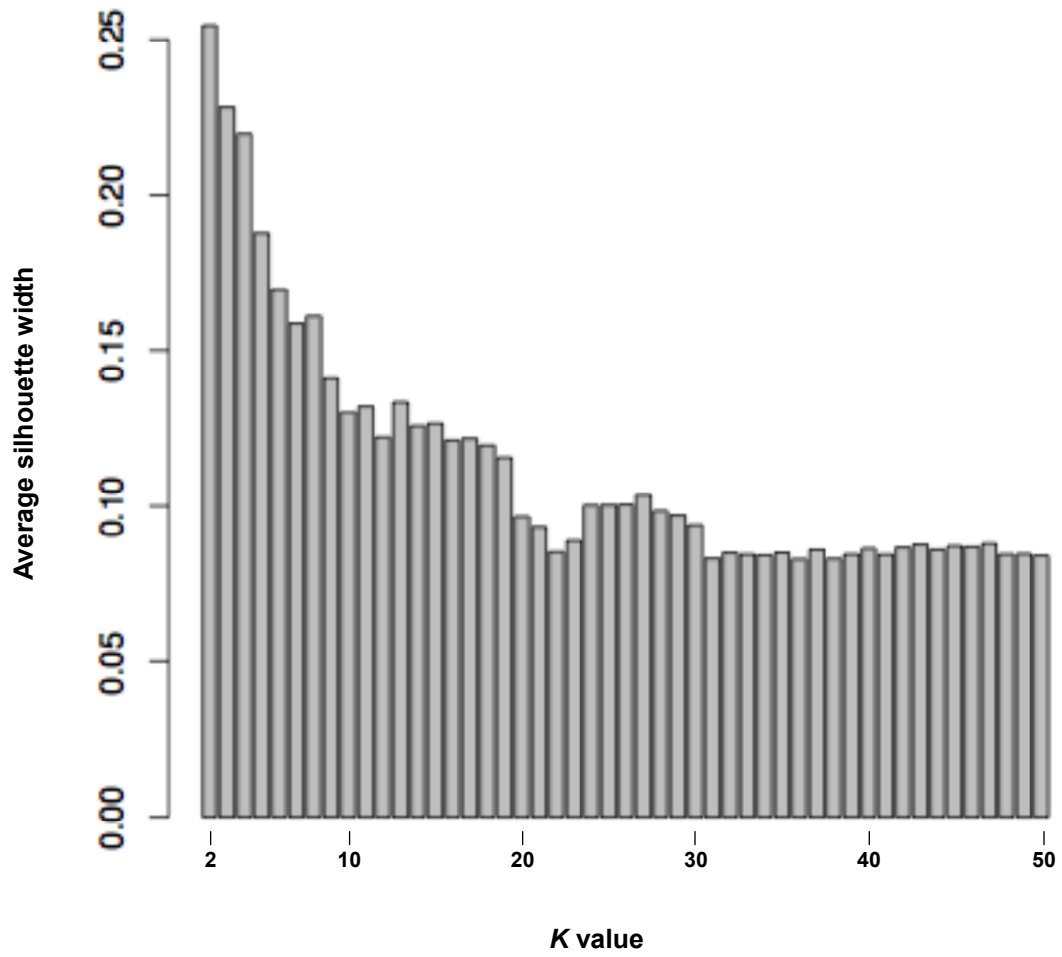

Supplement: ssn083_1.pdf [file ssn083_1.pdf]
