# Supplementary material
Source: PubMed Central journal article supplement (PMC2639733)

**Figure S2**

**Silhouette plot of HOPACH clustering of RLK expression profiles**

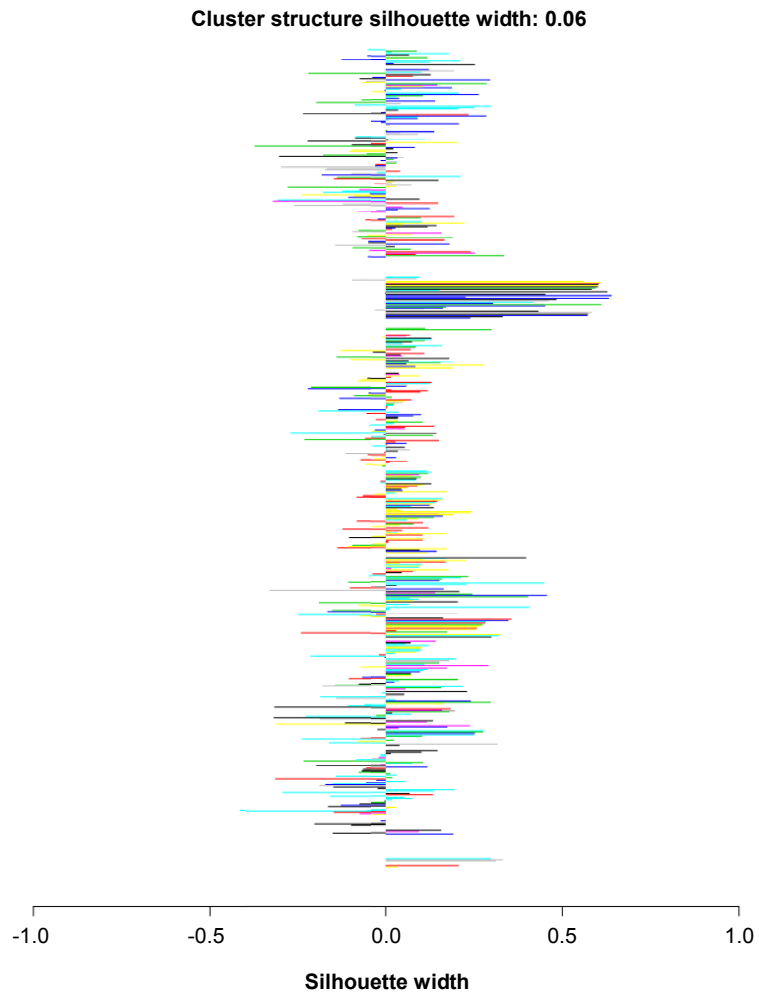

Supplement: ssn083_2.pdf [file ssn083_2.pdf]
